# Supplementary material for: Efficacy of prehospital National Early Warning Score to predict outpatient disposition at an emergency department of a Japanese tertiary hospital: a retrospective study
Source: PubMed Central journal article supplement — BMJ Open. 2020 Jun 15;10(6):e034602. doi: 10.1136/bmjopen-2019-034602 (PMC7299041; doi:10.1136/bmjopen-2019-034602), 2020-06-15
Supplement: bmjopen-2019-034602supp001.pdf [file bmjopen-2019-034602supp001.pdf]

Takuro Endo; Prehospital NEWS in Japan

Supplementary Table 1. Scoring system of NEWS.

| Physiological parameters | +3    | +2         | +1            | 0             | +1            | +2          | +3    |
|--------------------------|-------|------------|---------------|---------------|---------------|-------------|-------|
| Respiration Rate         | ≤8    |            | 9~11          | 12~20         |               | 21~24       | 25≤   |
| Oxygen Saturations       | ≤91   | 92~93      | 94~95         | ≥96           |               |             |       |
| Any Supplemental Oxygen  |       | Yes        |               | No            |               |             |       |
| Temperature              | ≤35.0 |            | 35.1~<br>36.0 | 36.1~<br>38.0 | 38.1~<br>39.0 |             | 39.1≤ |
| Systolic Blood Pressure  | ≤90   | 91~<br>100 | 101~<br>110   | 111~<br>219   |               |             | 220≤  |
| Heart rate               | ≤40   |            | 41~50         | 51~90         | 91~<br>110    | 111~<br>130 | 131≤  |
| Level of Consciousness   |       |            |               | Alert         |               |             | V.P.U |

NEWS: National Early Warning Score

V: voice responsive

P: pain responsive

U: unconscious

Takuro Endo; Prehospital NEWS in Japan

Supplementary Table 2. Coordinate points of the ROC curves in Figure 2 (main text) with corresponding sensitivity and specificity.

| Score | Admitted to a ward<br>or admitted to the ICU<br>or died in ED (C = 0.733) |                 | Admitted to the ICU<br>or died in ED (C = 0.807) |                 | Died in ED (C = 0.900) |                 |
|-------|---------------------------------------------------------------------------|-----------------|--------------------------------------------------|-----------------|------------------------|-----------------|
|       | Sensitivity                                                               | 1 - Specificity | Sensitivity                                      | 1 - Specificity | Sensitivity            | 1 - Specificity |
| -1.00 | 1.000                                                                     | 1.000           | 1.000                                            | 1.000           | 1.000                  | 1.000           |
| 0.50  | 0.958                                                                     | 0.853           | 0.992                                            | 0.901           | 1.000                  | 0.908           |
| 1.50  | 0.917                                                                     | 0.725           | 0.984                                            | 0.812           | 1.000                  | 0.826           |
| 2.50  | 0.865                                                                     | 0.614           | 0.972                                            | 0.726           | 1.000                  | 0.746           |
| 3.50  | 0.768                                                                     | 0.465           | 0.949                                            | 0.595           | 1.000                  | 0.623           |
| 4.50  | 0.688                                                                     | 0.359           | 0.909                                            | 0.497           | 1.000                  | 0.530           |
| 5.50  | 0.586                                                                     | 0.247           | 0.835                                            | 0.388           | 1.000                  | 0.423           |
| 6.50  | 0.502                                                                     | 0.163           | 0.764                                            | 0.303           | 1.000                  | 0.339           |
| 7.50  | 0.417                                                                     | 0.111           | 0.685                                            | 0.234           | 1.000                  | 0.268           |
| 8.50  | 0.328                                                                     | 0.066           | 0.598                                            | 0.167           | 0.909                  | 0.200           |
| 9.50  | 0.243                                                                     | 0.038           | 0.476                                            | 0.115           | 0.636                  | 0.143           |
| 10.50 | 0.188                                                                     | 0.025           | 0.402                                            | 0.083           | 0.545                  | 0.108           |
| 11.50 | 0.132                                                                     | 0.014           | 0.335                                            | 0.051           | 0.500                  | 0.073           |
| 12.50 | 0.096                                                                     | 0.010           | 0.268                                            | 0.035           | 0.409                  | 0.053           |
| 13.50 | 0.068                                                                     | 0.008           | 0.185                                            | 0.025           | 0.273                  | 0.038           |
| 14.50 | 0.042                                                                     | 0.004           | 0.098                                            | 0.017           | 0.227                  | 0.023           |
| 15.50 | 0.026                                                                     | 0.000           | 0.075                                            | 0.008           | 0.136                  | 0.013           |

Takuro Endo; Prehospital NEWS in Japan

|       |       |       |       |       |       |       |
|-------|-------|-------|-------|-------|-------|-------|
| 16.50 | 0.013 | 0.000 | 0.043 | 0.003 | 0.045 | 0.006 |
| 17.50 | 0.004 | 0.000 | 0.012 | 0.001 | 0.000 | 0.002 |
| 18.50 | 0.003 | 0.000 | 0.004 | 0.001 | 0.000 | 0.001 |
| 19.50 | 0.002 | 0.000 | 0.004 | 0.001 | 0.000 | 0.001 |

ROC: receiver operating characteristics

ED: emergency department

ICU: intensive care unit

Because there is no principled statistical criterion for selecting an optimal cutoff point without information on "cost", we carefully chose the cut points (4.5 and 6.5) from the combinations of three sets of sensitivity and 1 - specificity presented in Supplement Table 4 from a clinical practice viewpoint. As a starting point, we calculated Youden's index, which is defined as a difference between sensitivity and 1 - specificity, or "sensitivity + specificity - 1"; we found the following values to be considered as candidate cut points for NEWS:

| Cut point | Youden's index |           |       |
|-----------|----------------|-----------|-------|
|           | Ward/ICU/Death | ICU/Death | Death |
| 3.5       | 0.303          | 0.354     | 0.377 |
| 4.5       | 0.329          | 0.412     | 0.47  |
| 5.5       | 0.339          | 0.447     | 0.577 |
| 6.5       | 0.339          | 0.461     | 0.661 |
| 7.5       | 0.306          | 0.451     | 0.732 |
| 8.5       | 0.262          | 0.431     | 0.709 |

Takuro Endo; Prehospital NEWS in Japan

For a "high/middle-risk" cut point, sensitivity for death and ICU admission is crucial. Among the values lower than 7.5 (sensitivity of 1 for death), we chose a value 6.5 because relatively higher sensitivity of ICU admission or death (about 3/4, or 75%).

Next, we considered that a "middle/low-risk" cut point should have had high sensitivity for a ward admission and minimal degree of specificity, e.g., over 50%-60%. Such points may be 3.5 or 4.5; we chose 4.5 because it has a better balance of sensitivity and specificity for ICU admission, too.

Takuro Endo; Prehospital NEWS in Japan

Supplementary Table 3. Breakdown of number of presentations by AMPDS category.

| All patients         |      |       | Discharged from ED   |      |       | Admitted to a ward   |      |       | Admitted to the ICU  |      |       | Died in ED           |      |       |
|----------------------|------|-------|----------------------|------|-------|----------------------|------|-------|----------------------|------|-------|----------------------|------|-------|
| Category             | %    | Cases |
| Sick Person          | 19.8 | 564   | Sick Person          | 24   | 319   | Breathing Difficulty | 17.5 | 221   | Subject Unconscious  | 28   | 65    | Subject Unconscious  | 50   | 11    |
| Subject Unconscious  | 13.8 | 392   | Traumatic Injuries   | 11.1 | 148   | Sick Person          | 17.4 | 220   | Breathing Difficulty | 18.1 | 42    | Sick Person          | 22.7 | 5     |
| Breathing Difficulty | 13.3 | 379   | Breathing Difficulty | 8.6  | 114   | Subject Unconscious  | 16   | 202   | Chest Pain           | 8.6  | 20    | Chest Pain           | 13.6 | 3     |
| Traumatic Injuries   | 8.3  | 236   | Subject Unconscious  | 8.6  | 114   | Stroke               | 10.6 | 134   | Sick Person          | 8.6  | 20    | Breathing Difficulty | 9.1  | 2     |
| Stroke               | 7.4  | 212   | Abdominal Pain       | 7.5  | 100   | Traumatic Injuries   | 6.4  | 81    | Abdominal Pain       | 6    | 14    | Psychiatric Problem  | 4.5  | 1     |
| Abdominal Pain       | 6.6  | 187   | Hemorrhage           | 7.2  | 96    | Abdominal Pain       | 5.8  | 73    | Traffic Collision    | 6    | 14    | -                    | -    | -     |
| Hemorrhage           | 5.9  | 169   | Chest Pain           | 6.3  | 84    | Hemorrhage           | 5.4  | 68    | Overdose             | 4.7  | 11    | -                    | -    | -     |
| Chest Pain           | 5.9  | 167   | Headache             | 6    | 80    | Chest Pain           | 4.8  | 60    | Stroke               | 4.3  | 10    | -                    | -    | -     |
| Headache             | 4.1  | 117   | Stroke               | 5.1  | 68    | Overdose             | 4    | 51    | Back Pain            | 3    | 7     | -                    | -    | -     |
| Back Pain            | 3.3  | 93    | Back Pain            | 4.1  | 54    | Headache             | 2.9  | 36    | Seizures             | 3    | 7     | -                    | -    | -     |
| Overdose             | 3.1  | 89    | Heart Problem        | 3.1  | 41    | Back Pain            | 2.5  | 32    | Traumatic Injuries   | 3    | 7     | -                    | -    | -     |
| Seizures             | 2.4  | 68    | Seizures             | 2.8  | 37    | Seizures             | 1.9  | 24    | Hemorrhage           | 2.2  | 5     | -                    | -    | -     |

## Takuro Endo; Prehospital NEWS in Japan

|                          |     |    |                                |     |    |                          |     |    |               |     |   |   |   |   |
|--------------------------|-----|----|--------------------------------|-----|----|--------------------------|-----|----|---------------|-----|---|---|---|---|
| Heart Problem            | 1.7 | 48 | Overdose                       | 2   | 27 | Traffic Collision        | 1.7 | 22 | Choking       | 1.7 | 4 | - | - | - |
| Traffic Collision        | 1.7 | 48 | Traffic Collision              | 0.9 | 12 | Choking                  | 0.6 | 8  | Falls         | 0.9 | 2 | - | - | - |
| Choking                  | 0.5 | 15 | Eye Problem                    | 0.7 | 9  | Heart Problem            | 0.5 | 6  | Burn Subject  | 0.4 | 1 | - | - | - |
| Burn Subject             | 0.4 | 12 | Stab<br>Gunshot<br>Penetrating | 0.5 | 7  | Psychiatric Problem      | 0.5 | 6  | Drowning      | 0.4 | 1 | - | - | - |
| Eye Problem              | 0.4 | 11 | Burn Subject                   | 0.5 | 6  | Burn Subject             | 0.4 | 5  | Headache      | 0.4 | 1 | - | - | - |
| Psychiatric Problem      | 0.4 | 10 | Assault                        | 0.2 | 3  | Falls                    | 0.3 | 4  | Heart Problem | 0.4 | 1 | - | - | - |
| Stab Gunshot Penetrating | 0.4 | 10 | Choking                        | 0.2 | 3  | Drowning                 | 0.2 | 3  | -             | -   | - | - | - | - |
| Falls                    | 0.2 | 7  | Psychiatric Problem            | 0.2 | 3  | Stab Gunshot Penetrating | 0.2 | 3  | -             | -   | - | - | - | - |
| Drowning                 | 0.2 | 5  | Allergic Reaction              | 0.2 | 2  | Eye Problem              | 0.2 | 2  | -             | -   | - | - | - | - |
| Assault                  | 0.1 | 3  | Diabetic Problems              | 0.1 | 1  | Diabetic Problems        | 0.1 | 1  | -             | -   | - | - | - | - |
| Allergic Reaction        | 0.1 | 2  | Drowning                       | 0.1 | 1  | Environmental Exposure   | 0.1 | 1  | -             | -   | - | - | - | - |
| Diabetic                 | 0.1 | 2  | Falls                          | 0.1 | 1  | -                        | -   | -  | -             | -   | - | - | - | - |

## Takuro Endo; Prehospital NEWS in Japan

|                        |     |      |       |     |      |       |     |      |       |     |     |       |     |    |
|------------------------|-----|------|-------|-----|------|-------|-----|------|-------|-----|-----|-------|-----|----|
| Problems               |     |      |       |     |      |       |     |      |       |     |     |       |     |    |
| Environmental Exposure | 0   | 1    | -     | -   | -    | -     | -   | -    | -     | -   | -   | -     | -   | -  |
| Total                  | 100 | 2847 | Total | 100 | 1330 | Total | 100 | 1263 | Total | 100 | 232 | Total | 100 | 22 |

Takuro Endo; Prehospital NEWS in Japan

Supplementary Table 4. Summary statistics of prehospital NEWS by patient dispositions.

|         | All (n=2,847) | Patient disposition                 |                                     |                                     |                        |
|---------|---------------|-------------------------------------|-------------------------------------|-------------------------------------|------------------------|
|         |               | Discharged<br>from ED<br>(n = 1330) | Admitted to<br>a ward<br>(n = 1263) | Admitted to<br>the ICU<br>(n = 232) | Died in ED<br>(n = 22) |
| Median  | 5             | 3                                   | 6                                   | 9                                   | 11.5                   |
| Range   | 0-20          | 0-15                                | 0-20                                | 0-20                                | 8-17                   |
| Mean±SD | 5.4±3.9       | 3.7±2.9                             | 6.3±3.8                             | 9.4±4.0                             | 11.7±2.9               |

NEWS: National Early Warning Score

ED: emergency department

ICU: intensive care unit

SD: standard deviation
